# Supplementary material for: Genuine and Sequestered Natural Products from the Genus Orobanche (Orobanchaceae, Lamiales)
Source: Molecules. 2018 Oct 30;23(11):2821. doi: 10.3390/molecules23112821 (PMC6278508; doi:10.3390/molecules23112821)
Supplement: Supplementary file 1 [file molecules-23-02821-s001.zip › Supp-Tabs 1_2.xlsx]

## Sheet: Tabelle1
Table S1. Natural products synthesized by Orobanche species					Compounds
Taxa	1	2	3	4	5	6	7	8	9	10	11	12	13	14	15	16	17	18	19	20	21	22	23	24	25	26	27	28	29	30	31	32	33	34	35	36	37	38	39	40	41	42	43	44	45	46	47	48	49
Orobanche Sect. Orobanche
Orobanche alba																																													1
Orobanche amethystea										1																			1
Orobanche anatolica
Orobanche artemisiae-campestris subsp. picridis																																													1
Orobanche caryophyllacea																																													1
Orobanche cernua		1						1		1				1			1	1	1				1	1			1		1	1	1	1	1	1	1	1	1	1	1	1	1	1	1
Orobanche coerulescens		1		1			1	1	1	1			1					1			1	1	1			1	1	1	1	1	1	1		1
Orobanche crenata	1		1	1	1	1				1	1												1						1																1
Orobanche denudata										1																			1
Orobanche foetida
Orobanche gracilis																																													1
Orobanche grisebachii
Orobanche hederae										1																			1																1
Orobanche loricata										1																			1																1
Orobanche lutea																																														1	1	1	1
Orobanche minor										1										1									1																1
Orobanche owerinii
Orobanche pubescens
Orobanche pycnostachya										1				1											1				1
Orobanche rapum-genistae										1																			1																1
Orobanche sanguinea										1																			1
Orobanche variegata																																													1
Phelipanche (Orobanche Sect. Trionychon)
Phelipanche aegyptiaca										1	1			1	1
Phelipanche arenaria												1				1																													1
Phelipanche oxyloba
Phelipanche ramosa										1	1			1	1														1															1	1
Sums	1	2	1	2	1	1	1	2	1	13	3	1	1	4	2	1	1	2	1	1	1	1	3	1	1	1	2	1	12	2	2	2	1	2	1	1	1	1	1	1	1	1	1	1	12	1	1	1	1
Table S2.
Natural Products sequestered by Orobanche species from host species.																					Sums
	Compounds
Orobanche species [host]	S1	S2	S3	S4	S5	S6	S7	S8	S9	S10	S12	S13	S11	S14	S15	S16	S17	S18	S19
Orobanche hederae [Hedera helix]															1	1	1						3
Orobanche rapum-genistae [Cytisus scoparius]	1	1	1	1	1	1	1	1	1	1	1	1	1	1									14
Phelipanche ramosa [Cannabis sativa]																		1	1				2
Sums	1	1	1	1	1	1	1	1	1	1	1	1	1	1	1	1	1	1	1				19
[truncated: 25 more columns]
